## Review

# Pre-Pregnancy Body Mass Index in Relation to Infant Birth Weight and Offspring Overweight/Obesity: A Systematic Review and Meta-Analysis

Zhangbin Yu, Shuping Han, Jingai Zhu, Xiaofan Sun, Chenbo Ji, Xirong Guo\*

State Key Laboratory of Reproductive Medicine, Department of Pediatrics, Nanjing Maternity and Child Health Care Hospital, Nanjing Medical University, Nanjing, China

**Background:** Overweight/obesity in women of childbearing age is a serious public-health problem. In China, the incidence of maternal overweight/obesity has been increasing. However, there is not a meta-analysis to determine if pre-pregnancy body mass index (BMI) is related to infant birth weight (BW) and offspring overweight/obesity.

**Methods:** Three electronic bibliographic databases (MEDLINE, EMBASE and CINAHL) were searched systematically from January 1970 to November 2012. The dichotomous data on pre-pregnancy overweight/obesity and BW or offspring overweight/obesity were extracted. Summary statistics (odds ratios, ORs) were used by Review Manager, version 5.1.7.

**Results:** After screening 665 citations from three electronic databases, we included 45 studies (most of high or medium quality). Compared with normal-weight mothers, pre-pregnancy underweight increased the risk of small for gestational age (SGA) (odds ratios [OR], 1.81; 95% confidence interval [CI], 1.76–1.87); low BW (OR, 1.47; 95% CI, 1.27–1.71). Pre-pregnancy overweight/obesity increased the risk of being large for gestational age (LGA) (OR, 1.53; 95% CI, 1.44–1.63; and OR, 2.08; 95% CI, 1.95–2.23), high BW (OR, 1.53; 95% CI, 1.44–1.63; and OR, 2.00; 95% CI, 1.84–2.18), macrosomia (OR, 1.67; 95% CI, 1.42–1.97; and OR, 3.23; 95% CI, 2.39–4.37), and subsequent offspring overweight/obesity (OR, 1.95; 95% CI, 1.77–2.13; and OR, 3.06; 95% CI, 2.68–3.49), respectively. Sensitivity analyses revealed that sample size, study method, quality grade of study, source of pre-pregnancy BMI or BW had a strong impact on the association between pre-pregnancy obesity and LGA. No significant evidence of publication bias was observed.

**Conclusions:** Pre-pregnancy underweight increases the risk of SGA and LBW; pre-pregnancy overweight/obesity increases the risk of LGA, HBW, macrosomia, and subsequent offspring overweight/obesity. A potential effect modification by maternal age, ethnicity, gestational weight gain, as well as the role of gestational diseases should be addressed in future studies.

## Introduction

Overweight/obesity in women of childbearing age is a serious public-health problem, especially in “developing” countries. In China, from 1992 to 2010, the prevalence of overweight or obesity in women aged 18–44 years increased from 16.8% to 26.4%, and from 3.1% to 9.0%, respectively [1–2]. Worryingly, these estimates of prevalence are higher in “developed” nations. In

the UK, the prevalence of maternal obesity has more than doubled from 7.6% to 15.6% from 1989 to 2007, respectively [3]. In women aged 20–39 years residing in North America, the prevalence of obesity increased from 13.0% to 22.0% from 1993 to 2003 [4]. In 2008, data from the Pregnancy Nutrition Surveillance System of USA showed that the prevalence of pre-pregnancy obesity increased to 28.5% [5].

The impact of pre-pregnancy body mass index (BMI) on pregnant and neonatal outcomes, as well as subsequent disease risk in the offspring, has attracted widespread attention. Pre-pregnancy underweight has been shown to increase the risk of preterm birth and low birth weight (BW) [6], as well as to increase the risk of subsequent obesity and hypertension in the offspring [7]. Pre-pregnancy overweight/obesity is a risk factor for diabetes mellitus (DM), hypertension, and preeclampsia in pregnancy [8–10]. However, it also increases the risk of caesarean and instrumental deliveries, hemorrhage, infection and maternal mortality during labor [11–14]. Pre-pregnancy overweight/obesity has been shown to increase the risk of adverse neonatal outcome (e.g., preterm delivery, low/high BW, congenital anomalies, neonatal asphyxia, neonatal death, hypoglycemia, and hyperbilirubinemia), increased requirement for neonatal intensive care, and a longer duration of hospital stay [15–18]. Maternal overweight/obesity carries an increased risk of subsequent disease risk in the offspring. This can include impaired neurodevelopmental outcome (cognitive problems, attention deficit hyperactivity disorder, and psychotic disorders), asthma, schizophrenia, insulin resistance, DM, hypertension, coronary heart disease, stroke, and even death [19–23].

**Citation:** Yu Z, Han S, Zhu J, Sun X, Ji C, et al. (2013) Pre-Pregnancy Body Mass Index in Relation to Infant Birth Weight and Offspring Overweight/Obesity: A Systematic Review and Meta-Analysis. PLoS ONE 8(4): e61627. doi:10.1371/journal.pone.0061627

**Editor:** Hamid Reza Baradaran, Tehran University of Medical Sciences, Iran (Islamic Republic of)

**Received:** January 9, 2013; **Accepted:** March 12, 2013; **Published:** April 16, 2013

**Copyright:** © 2013 Yu et al. This is an open-access article distributed under the terms of the Creative Commons Attribution License, which permits unrestricted use, distribution, and reproduction in any medium, provided the original author and source are credited.

**Funding:** This work was supported by grants from the National Key Basic Research Program of China (2013CB530604), the National Natural Science Foundation of China (Grant No. 81270928), the Priority Academic Program Development of Jiangsu Higher Education Institutions (Grant No. 201104013), the Natural Science Foundation of Jiangsu Province (Grant No. BK2011107), and the Medical Innovation Team Project of Jiangsu Province (LJ201108). The funders had no role in study design, data collection and analysis, decision to publish, or preparation of the manuscript.

**Competing Interests:** The authors have declared that no competing interests exist.

\* E-mail: xrguo@njmu.edu.cn

In recent years, evidence has accumulated and supported the notion that the intrauterine environment can “program” or affect pregnancy and neonatal outcomes, as well as subsequent long-term health and development in the offspring; this is referred to as the “fetal programming” or “fetal origins hypothesis” [24]. BW is frequently used as an indicator of the conditions experienced *in utero* [25]. The association between BW and subsequent obesity in the also has been confirmed [26]. Pre-pregnancy BMI has an impact on BW [27]. Therefore, we suspect that BW may be a key feature explaining the association between pre-pregnancy BMI and subsequent obesity in the offspring.

Hence, maternal BMI during pre-pregnancy can affect overweight/obesity in the offspring. In addition, it may be a modifiable risk factor for childhood overweight/obesity if the BW is optimized. Therefore, this area is of particular worth as a study area. Reviews on this topic have been limited by the use of qualitative methodology analyzing a limited number of studies [22,28]. Therefore, we carried out a systematic review of extant studies to determine if pre-pregnancy BMI is related to the BW of infants and overweight/obesity in the offspring.

## Methods

This systematic review and meta-analysis was conducted according to the guidelines for the Meta-analysis of Observational Studies in Epidemiology (MOOSE) [29].

### Study selection

Observational studies (cohort, case-control, and cross-sectional) were included irrespective of publication status, sample size, follow-up duration, or language. Studies defined pre-pregnancy BMI categories according to different standards. The first was according to the recommendation of Abrams and Parker [30]: underweight ( $\text{BMI} < 20 \text{ kg m}^{-2}$ ), normal weight ( $20\text{--}24.9 \text{ kg m}^{-2}$ ), overweight ( $25\text{--}29.9 \text{ kg m}^{-2}$ ), and obese ( $\geq 30 \text{ kg m}^{-2}$ ). The second was according to the World Health Organization (WHO) classification [31]: underweight ( $< 18.5 \text{ kg m}^{-2}$ ), normal weight ( $18.5\text{--}24.9 \text{ kg m}^{-2}$ ), overweight ( $25\text{--}29.9 \text{ kg m}^{-2}$ ), and obese ( $\geq 30 \text{ kg m}^{-2}$ ). The third was according to recommendations set by the Institute of Medicine (IOM) [32]: underweight ( $< 19.8 \text{ kg m}^{-2}$ ), normal weight ( $19.8\text{--}26.0 \text{ kg m}^{-2}$ ), overweight ( $26.1\text{--}29.0 \text{ kg m}^{-2}$ ), and obese ( $> 29.0 \text{ kg m}^{-2}$ ). The fourth was according to the BMI classification for Chinese adults proposed by the Working Group on Obesity in China (WGOC) in 2001 [33]: underweight ( $< 18.5 \text{ kg m}^{-2}$ ), normal weight ( $18.5\text{--}23.9 \text{ kg m}^{-2}$ ), overweight ( $24.0\text{--}27.9 \text{ kg m}^{-2}$ ), and obese ( $\geq 28.0 \text{ kg m}^{-2}$ ). The fifth was according to the Asia-Pacific standard (APS) [34]: underweight ( $< 18.5 \text{ kg m}^{-2}$ ), normal weight ( $18.5\text{--}22.9 \text{ kg m}^{-2}$ ), overweight ( $23.0\text{--}24.9 \text{ kg m}^{-2}$ ), and obese ( $\geq 25.0 \text{ kg m}^{-2}$ ). Studies have been carried out that define BW categories [35]. That is, large-for-gestational-age (LGA) and small-for-gestational-age (SGA) births were defined if BWs were above the 90th percentile and below the 10th percentile, respectively, using gestational age- and sex-specific reference curves. High birth weight (HBW) and low birth weight (LBW) births were assessed by BW irrespective of gestational age, and corresponded to  $> 4,000 \text{ g}$  and  $< 2,500 \text{ g}$ , respectively. Macrosomia was defined as  $\text{BW} \geq 4,500 \text{ g}$ . Studies that defined offspring overweight/obesity categories according to the BMI were included. The Centers for Disease Control and Prevention (CDC) [29] and International Obesity Task Force (IOTF) [21] have separately published BMI reference standards for children and adolescents; overweight was defined as a BMI more than the 85th percentile but less than the 95th percentile

according to sex and age, whereas obesity was defined as a BMI above the 95th percentile. Studies that classified overweight/obesity in offspring according to the deviation from the ideal weight-for-height recommended by the WHO were also included. In these studies, the ratio of weight (W) to ideal weight (IW) was calculated; overweight was defined as  $W/IW > 1.1$ , and obesity as  $W/IW > 1.2$  [36]. Pre-pregnancy BMI, infant BW or offspring overweight/obesity were recorded from self-reported statements, medical records or obtained by interview or questionnaire.

### Data sources and search strategies

The search strategy was developed with the assistance of a librarian (Q Tang) experienced in systematic reviews based at Southeast University (Nanjing, China), and was adapted for each database searched. The search term was “pregnancy”, “pre-pregnancy”, “body mass index”, “obesity”, “overweight”, “birth weight”, “childhood”, “infant”, “adolescence”. (please see Appendix S1).

Three electronic bibliographic databases (MEDLINE, EMBASE and CINAHL) were searched systematically from January 1970 to November 2012. There were no restrictions regarding language or country. Searching of gray literature and hand-searching was not performed. If data in the original publication were not sufficiently detailed, the authors were contacted for additional information. The reference list of included studies should be searched for addition eligible studies.

### Screening and data-extraction form

All citations identified by electronic databases were organized, duplicates deleted, and each citation assigned a unique identification number. Initially, two investigators (ZB Yu and JG Zhu) independently screened the results of the electronic searches to select potentially relevant citations based on titles and abstracts. Discrepancies were resolved through consensus. If the citation was relevant or if the title/abstract was not sufficient for deciding on inclusion/exclusion, full texts were retrieved and evaluated. All articles selected at first screening were read and abstracted independently by the two reviewers (ZB Yu and XF Sun). Differences between the two reviewers were resolved by consensus or referred to a third reviewer (CB Ji) if necessary. Information extracted from each article included: publication year, country, study design, study period, source of study population, source of pre-pregnancy BMI or BW, diagnostic criteria for pre-pregnancy or offspring overweight/obesity, study size, and confounding factors. An independent reviewer (XF Sun) confirmed all data entries. Raw data for the exposed, non-exposed, outcome, and non-outcome groups were obtained if possible. Otherwise, odds ratios (ORs) were recorded, with preference given to crude ORs or adjusted ORs.

### Quality assessment

To assess the quality of included studies, we created a specific Quality Assessment Scale (Appendix S2) based on the criteria proposed by Strengthening the Reporting of Observational Studies in Epidemiology and Tooth *et al.* for the assessment of observational studies [37]. Briefly, we assessed the quality of all included studies in accordance with the following items: type of study, loss of follow-up, sample size, participant selection, comparability of groups, statistical method, and diagnostic criteria for pre-pregnancy overweight/obesity, measurement of BW/offspring overweight or obesity. According to the score achieved (from 0 to 18), studies were classified as being of high ( $> 14$ ), medium (11–14) or low ( $< 11$ ) quality.

## Statistical analyses

If we could not obtain sufficient dichotomous data on pre-pregnancy overweight/obesity and BW or offspring overweight/obesity from these studies (which presented crude ORs or adjusted ORs on the association), we included these studies in the systematic review. Studies that could construct separate 2×2 tables to calculate the ORs and 95% confidence intervals (CIs) were included in the meta-analysis. The chi-squared test was used to test for heterogeneity across studies. A random effects model was used to account for possible heterogeneity between studies, which defaults to the fixed effects model approach in the absence of heterogeneity [38].  $P < 0.01$  was considered significant. Statistical analyses were conducted using Review Manager, ver5.1.7 (Nordic Cochrane Center, Copenhagen, Denmark). We undertook subgroup analyses according to the different pre-pregnancy categories of the BMI, which compared pre-pregnancy underweight, overweight, obesity and pre-pregnancy normal weight. We also undertook subgroup analyses according to the different categories of BW: SGA, LGA, LBW, HBW, and macrosomia. Sensitivity analyses were carried out to determine differences in statistical method, study design, sample size, quality grade of the study, and diagnostic criteria for pre-pregnancy overweight/obesity. Publication bias was assessed by inspection of the funnel plot and formal testing for asymmetry of the funnel plot using Egger's test [39]. These calculations were carried out using Stata/SE, ver9 (Stata, College Station, TX, USA).

## Results

### Description of studies

A search of three electronic databases identified 665 articles, 620 of which were excluded based on the reasons listed in Figure 1. Forty-five articles were included in the systematic review and meta-analysis [13,16,40–82]: 3 case-control [44,48,57], 4 cross-sectional [62,63,73,80], and 38 cohort [13,16,40–43,45–47,49–56,58–61,64–72,74–79,81,82] studies. In one of these studies, the impact of pre-pregnancy BMI on BW and overweight/obesity in offspring was assessed [54]. In the remaining 44 articles, 33 articles [13,16,40–53,55–71] investigated the association between pre-pregnancy BMI and BW (the descriptive information for each included study is presented in Table S1). Eleven articles [72–82] analyzed the impact of pre-pregnancy BMI on offspring overweight/obesity (descriptive information for each included study is presented in Table S2).

In 45 studies of pre-pregnancy categories of the BMI, 10 studies were according to the recommendation of Abrams and Parker [40,41,43,45,49,55,58,62,64,80], 24 studies were according to the classification set by the WHO [16,42,47,48,51–54,56,57,65,69–79,81,82], 8 studies were according to the IOM recommendations [44,46,50,60,61,66–68], 2 studies were according to the classification proposed by the WGO [13,59] and 1 study was according to the APS [63]. According to the BW categories, SGA were investigated in 16 studies [13,16,41,47,48,51,53–57,61,66,69–71], LGA in 21 studies [13,16,40,42,47–51,53–57,59–61,66,69–71], LBW in 10 studies [41,43,45,46,48,61,63,65,68,71], HBW in 12 studies [41–43,45,46,49,58,61,63,65,67,71] and macrosomia in 10 studies [44,48–50,52,53,57,58,62,64]. According to the categories of overweight/obesity in offspring, 6 studies were according to CDC recommendations [54,74–77,82], 5 studies were according to IOTF recommendations [72,73,78,80,81] and 1 study was according to the classification set by the WHO (W/IW) [79]. The quality of each study is summarized in Appendices S3. Six studies received scores of  $\geq 15$  and were considered to be of high methodological quality [40,43,50,53,78,80]. Nineteen studies

received scores between 11 and 14, and were considered to be of medium methodological quality [16,41,45,47,49,51,54,55,59–61,66,67,69,70,72,74,75,81]. The remaining 20 studies received scores of  $\leq 10$  and were considered to be of low methodological quality [13,42,44,46,48,52,56–58,62–65,68,71,73,76,77,79,82]. The PRISMA statement see checklist S1.

### Effect of pre-pregnancy BMI on infant BW

Thirty-four articles [13,16,40–71] investigated the association between pre-pregnancy BMI and infant BW. Sixteen studies assessed the association between pre-pregnancy BMI and SGA [13,16,41,47,48,51,53–57,61,66,69–71]. In comparison with a mother with a normal BMI, the results from this analysis revealed that pre-pregnancy underweight increased the risk of SGA (OR, 1.81; 95% CI, 1.76–1.87;  $P < 0.001$ ) (Figure 2). In contrast, pre-pregnancy overweight or obesity decreased the risk of LBW in the meta-analysis (OR, 0.83; 95% CI, 0.81–0.84; and OR, 0.81; 95% CI, 0.80–0.83;  $P < 0.001$ ) (Figure 2).

Twenty-one studies assessed the association between pre-pregnancy BMI and LGA [13,16,40,42,47–51,53–57,59–61,66,69–71]. In comparison with a mother with a normal BMI, the results from this analysis revealed that pre-pregnancy underweight decreased the risk of LGA (OR, 0.51; 95% CI, 0.46–0.56;  $P < 0.001$ ) (Figure 3). In contrast, pre-pregnancy overweight or obesity increased the risk of LGA in the meta-analysis (OR, 1.53; 95% CI, 1.44–1.63; and OR, 2.08; 95% CI, 1.95–2.23;  $P < 0.001$ ) (Figure 4).

Ten studies assessed the association between pre-pregnancy BMI and LBW [41,43,45,46,48,61,63,65,68,71]. In comparison with a mother with a normal BMI, the results from this analysis revealed that pre-pregnancy underweight increased the risk of LBW (OR, 1.47; 95% CI, 1.27–1.71;  $P < 0.001$ ) (Figure S1). In contrast, no significant association was revealed between pre-pregnancy overweight or obesity and LBW in the meta-analysis (OR, 0.88; 95% CI, 0.77–1.00; and OR, 1.09; 95% CI, 0.87–1.37;  $P > 0.010$ ) (Figure S1).

Twelve studies assessed the association between pre-pregnancy BMI and HBW [41–43,45,46,49,58,61,63,65,67,71]. We pooled the data from these studies and revealed a negative association between pre-pregnancy underweight and HBW (OR, 0.51; 95% CI, 0.43–0.61;  $P < 0.001$ ) (Figure S2). In contrast, pre-pregnancy overweight or obesity was associated with an increased risk of HBW in comparison with subjects with a normal BMI in the meta-analysis (OR, 1.53; 95% CI, 1.44–1.63; and OR, 2.00; 95% CI, 1.84–2.18;  $P < 0.001$ ) (Figure S2).

Ten studies assessed the association between pre-pregnancy BMI and macrosomia [44,48–50,52,53,57,58,62,64]. We pooled the data from these studies and revealed a negative association between pre-pregnancy underweight and macrosomia (OR, 0.51; 95% CI, 0.42–0.61;  $P < 0.001$ ) (Figure S3). In contrast, pre-pregnancy overweight or obesity was associated with an increased risk of macrosomia in comparison with subjects with a normal BMI in the meta-analysis (OR, 1.67; 95% CI, 1.42–1.97; and OR, 3.23; 95% CI, 2.39–4.37;  $P < 0.001$ ) (Figure S3).

### Effect of pre-pregnancy BMI on overweight/obesity in offspring

Twelve reports evaluated the association between pre-pregnancy BMI and overweight/obesity in offspring [54,72–82]. Only 4 studies [54,73,79,81] provided sufficient dichotomous data for pre-pregnancy BMI and offspring overweight/obesity, and were included in the meta-analysis. Results from this analysis revealed a negative association between pre-pregnancy underweight and

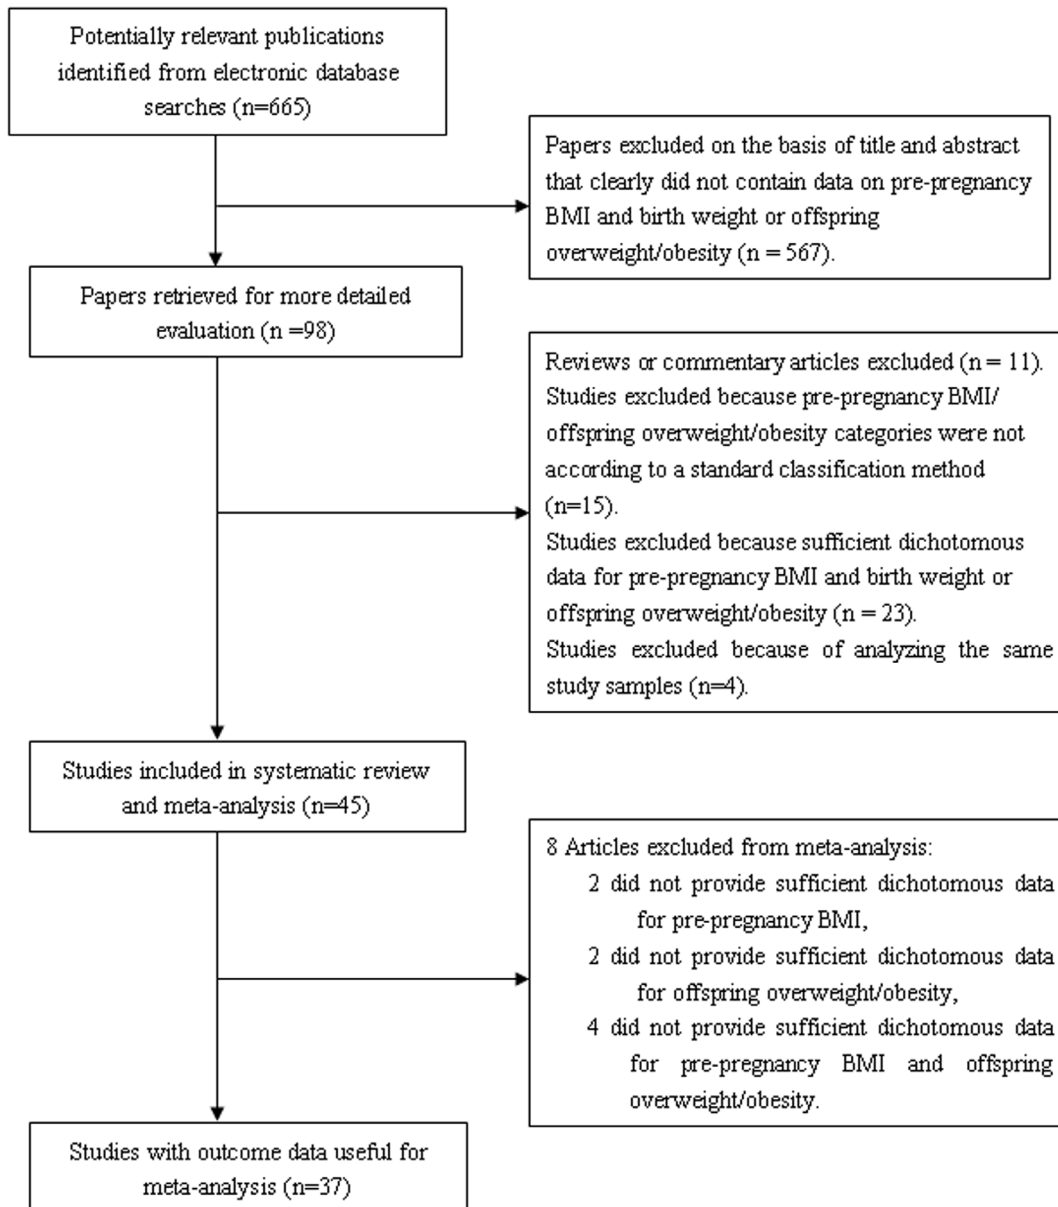

**Figure 1. Screening and selection process for articles.**

doi:10.1371/journal.pone.0061627.g001

offspring overweight/obesity (OR, 0.46; 95% CI, 0.37–0.56;  $P < 0.001$ ) (Figure S4). In contrast, pre-pregnancy overweight or obesity was associated with an increased risk of offspring overweight/obesity in comparison with subjects with a normal BMI in the meta-analysis (OR, 1.95; 95% CI, 1.77–2.13; and OR, 3.06; 95% CI, 2.68–3.49;  $P < 0.001$ ) (Figure S4).

The remaining 8 studies reported the outcomes using insufficient dichotomous data and could not be pooled by the meta-analysis. The results of these studies were non-conforming. Whitaker *et al.* [72] reported a retrospective cohort study in 8,494 children from low-income families who were enrolled in the Special Supplemental Nutrition Program for Women, Infants, and Children in Ohio, USA; a follow-up survey was conducted at ages 2, 3 and 4 years. That study found that pre-pregnancy underweight was associated with a decreased prevalence of childhood obesity; pre-pregnancy overweight or obesity was

associated with an increased risk of childhood obesity at ages 2, 3 and 4 years.

Li *et al.* [74] and Salsberry *et al.* [75] analyzed the 1996 National Longitudinal Survey of Youth, Child and Young Adult data in the USA. After adjusting for potential confounders, Li *et al.* [74] revealed that children at 2–14 years of age whose mothers were obese before pregnancy were also at a greater risk of becoming obese (OR, 4.1; 95% CI, 2.6–6.4;  $P < 0.001$ ) than children whose mothers had a normal BMI. Salsberry *et al.* [75] also found the same results at follow-up of 2–3, 4–5, 6–7 years of age. The results from this analysis revealed a negative association between pre-pregnancy underweight and overweight/obesity in offspring (OR, 0.46; 95% CI, 0.37–0.56;  $P < 0.001$ ) (Figure 3). In contrast to the results of the meta-analysis described above, Salsberry *et al.* [75] showed that pre-pregnancy underweight was not significantly associated with an increased risk of offspring obesity. Dubois *et al.*

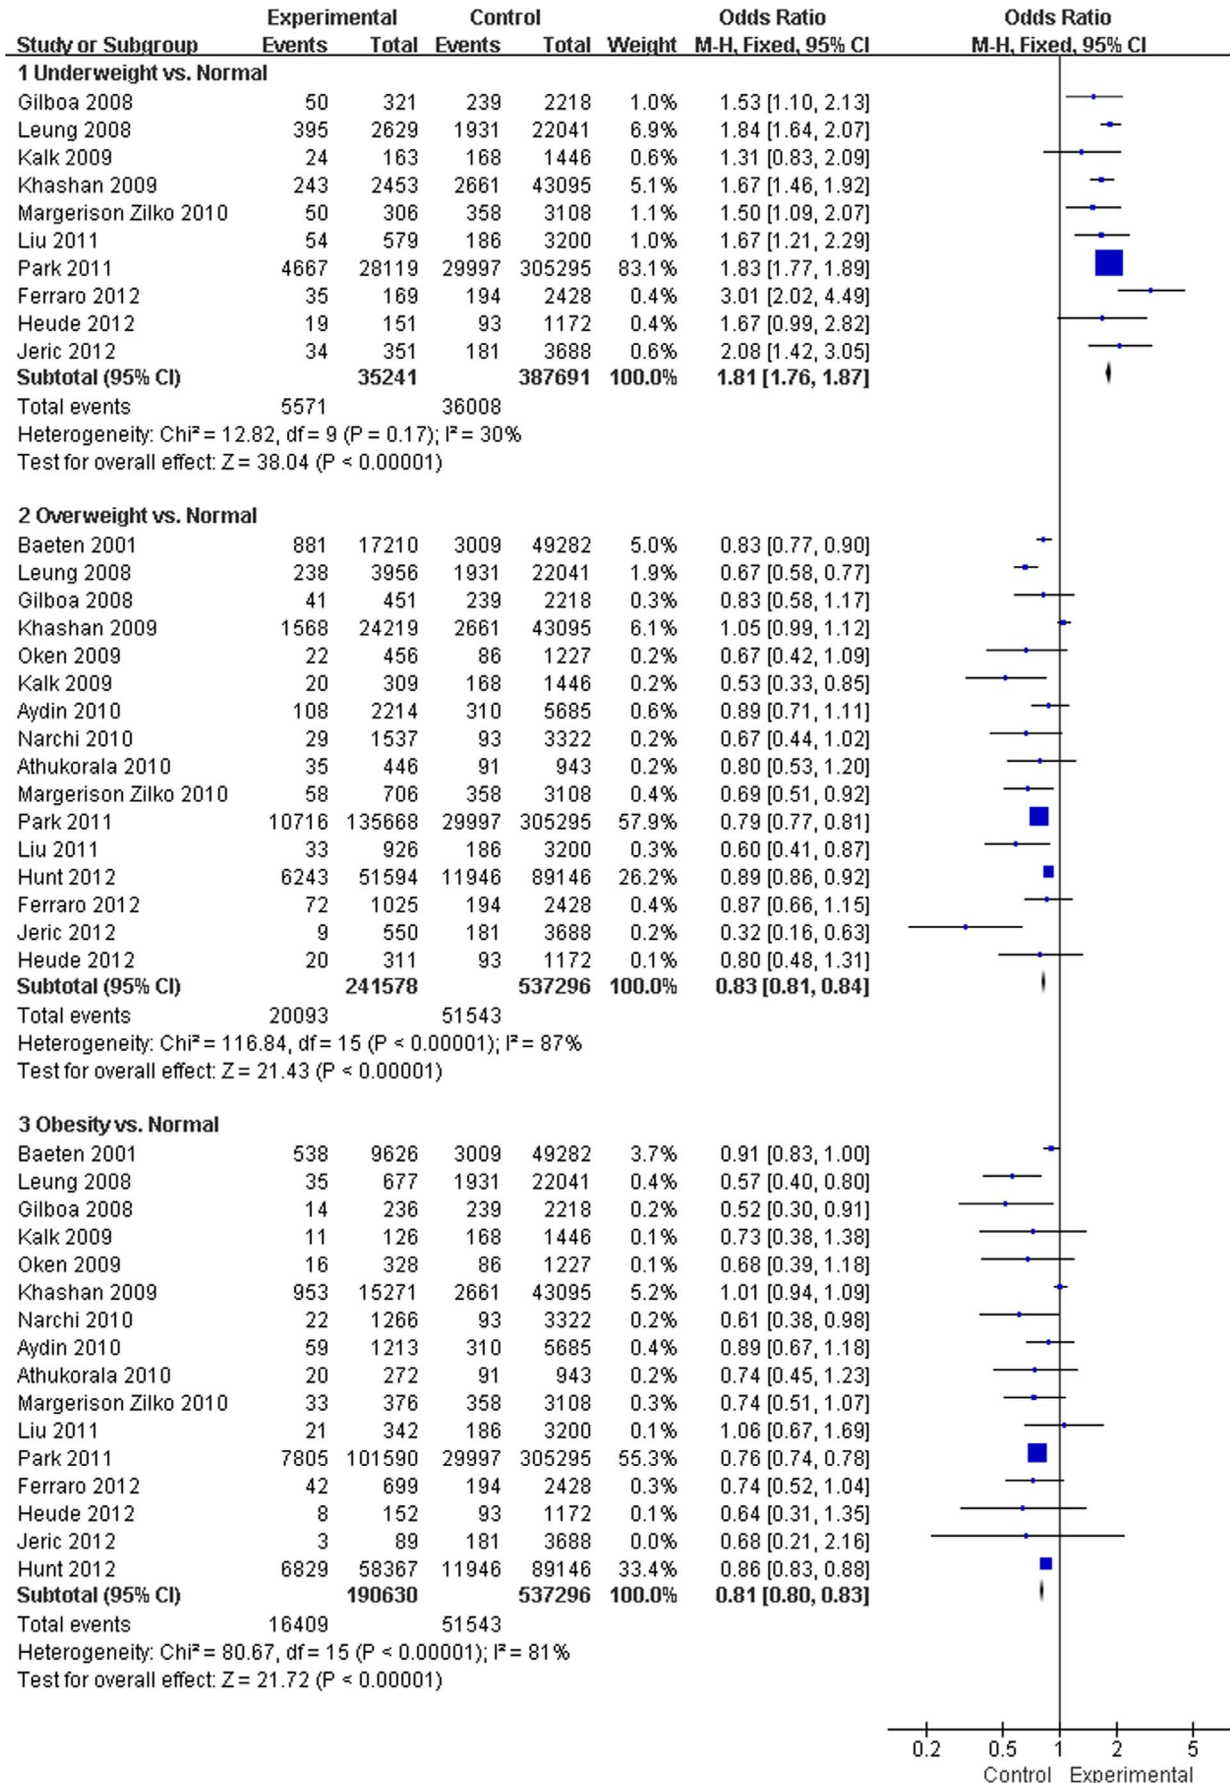

**Figure 2. Forest plot of the association between pre-pregnancy BMI and being SGA.**  
doi:10.1371/journal.pone.0061627.g002



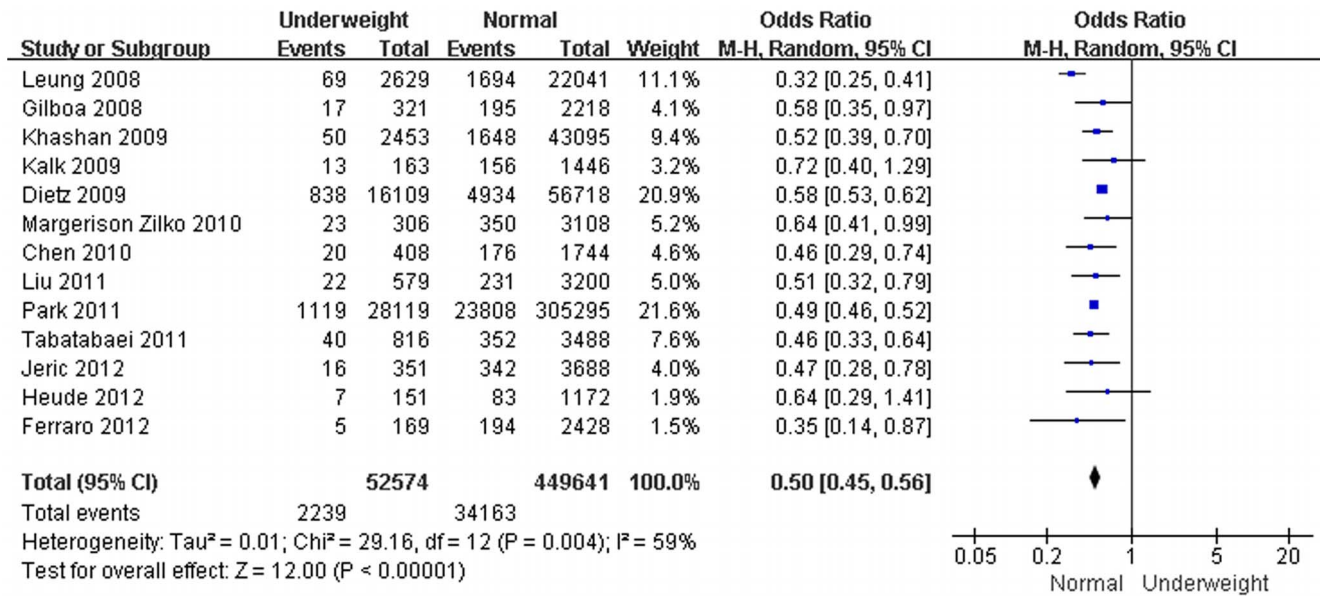

**Figure 3. Forest plot of the association between pre-pregnancy underweight and being LGA.**  
doi:10.1371/journal.pone.0061627.g003

[76] analyzed the data from the Quebec Longitudinal Study of Child Development 1998–2002, which also showed that pre-pregnancy underweight was not significantly associated with increased risk of offspring obesity at a follow-up of 4.5 years of age (OR, 0.7; 95% CI, 0.3–1.9;  $P > 0.010$ ).

Hawkins *et al.* [78] analyzed a prospective, nationally representative millennium cohort study in which 13,188 singleton children were enrolled. They showed that pre-pregnancy overweight was significantly associated with an increased risk of offspring overweight at a follow-up of 3 years of age (OR, 1.83; 95% CI, 1.66–2.02;  $P < 0.001$ ). Maddah *et al.* [80] investigated 6,635 children attending elementary schools in Rasht, Iran, by gathering data on pre-pregnancy BMI using a self-administrated questionnaire. After adjusting for potential confounders, pre-pregnancy overweight/obesity was shown to be associated with an increased risk of childhood overweight/obesity at ages 6–11 years (OR, 1.6; 95% CI, 1.1–2.3;  $P < 0.001$ ).

Two studies chose mothers with underweight and normal weight as the control, not mothers with normal weight. Hernandez-Valero *et al.* [77] undertook a population-based Mexican–American cohort study and found that pre-pregnancy obesity was significantly associated with an increased risk of offspring obesity at a follow-up of 5–18 years of age (OR, 2.14; 95% CI, 1.12–4.08;  $P > 0.001$ ). Janjua *et al.* [82] analyzed the data from a longitudinal study of pregnancy outcomes and childhood psychomotor development. They also revealed that pre-pregnancy obesity was significantly associated with an increased risk of offspring obesity at a follow-up of 5 years of age (OR, 2.92; 95% CI, 1.73–4.91;  $P > 0.001$ ).

#### Analyses of heterogeneity and publication bias

Heterogeneity ( $I^2 > 50\%$ ) was high for the pooled ORs of the studies in the meta-analysis. The  $\chi^2$ -test for heterogeneity was significant for the 21 studies investigating the association between pre-pregnancy obesity and LGA ( $\chi^2 = 186.88$ ,  $P < 0.001$ ), and this was taken into account by analyzing the data using a random model. Sensitivity analyses were carried out (Table 1), and subgroups were divided based on the differences in statistical

method, study design, study method, sample size, quality grade of study, source of pre-pregnancy BMI, pre-pregnancy BMI categories, distribution of pre-pregnancy BMI, source of BW, and the geographic location of the study.

The results showed that the differences in sample size, study method, quality grade of study, and source of pre-pregnancy BMI or infant BW made a strong impact on the association between pre-pregnancy obesity and LGA. Inspection of funnel plots did not reveal an obvious effect of publication bias, and Egger's test for publication bias was not significant ( $P = 0.813$ ) for studies investigating the association between pre-pregnancy obesity and LGA (Appendix S4).

#### Discussion

The present comprehensive systematic review and meta-analysis indicated: that pre-pregnancy underweight increased the risk of SGA and LBW; that pre-pregnancy overweight or obesity increased the risk of LGA, HBW, macrosomia; subsequent offspring overweight/obesity in comparison with mothers with a normal BMI. The present study suggests inconsistency regarding the association between pre-pregnancy underweight and offspring overweight/obesity. Further prospective studies are needed to examine whether a causative relationship between pre-pregnancy underweight and offspring overweight/obesity exists.

The systematic review provided here was developed by a robust search strategy. Furthermore, we strove to obtain information following the MOOSE recommendations. The prevalence of pre-pregnancy overweight/obesity is increasing in many parts of the world. Acceptance of the problem and subsequent epidemiological studies have begun in recent years, as reflected by the fact that 66.7% of the studies identified for this review were conducted in between 2009 and 2012.

Sources of bias in any meta-analysis are the selection and heterogeneity of the included studies. In this regard, a specific limitation of our systematic review and meta-analysis is related to the difficulty of combining studies that used different methods to assess and classify the exposure (pre-pregnancy BMI) and outcome (infant BW and offspring overweight/obesity) of the participants.

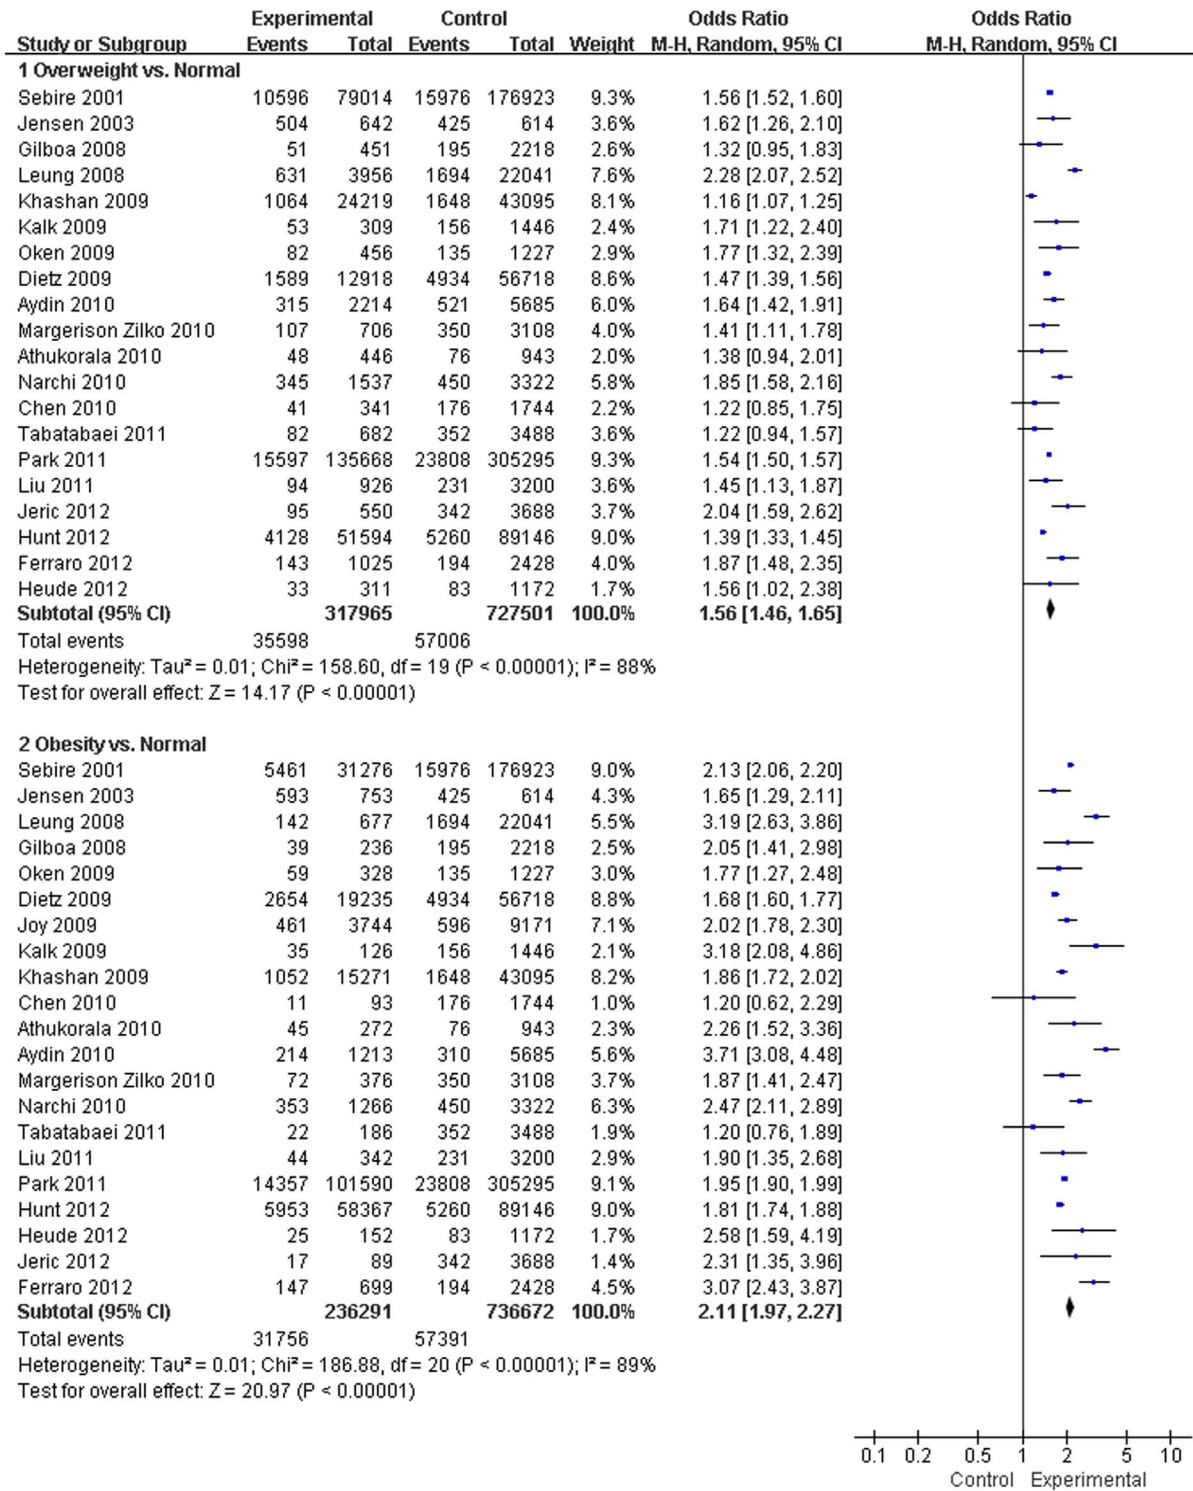

**Figure 4. Forest plot of the association between pre-pregnancy overweight or obesity and being LGA.**  
doi:10.1371/journal.pone.0061627.g004

This is related directly to the lack of consensus about the categorization of pre-pregnancy BMI and offspring overweight/obesity.

We undertook subgroup analyses to evaluate other sources of bias in the review (Table 1). We found that differences in sample size, study method, quality grade of study, source of pre-pregnancy BMI

or infant BW had a strong impact on the association between pre-pregnancy obesity and LGA, and that the factors may explain (at least in part) the heterogeneity between studies. Further studies should consider these factors and avoid such sources of heterogeneity.

Simultaneously, we assessed the quality of included studies, and found that 86.7% of the studies were of low/medium and not high

**Table 1.** Sensitivity analyses of the relationship between pre-pregnancy obesity and being LGA.

| <i>Subgroup</i>                          | <i>Number of studies (n)</i> | <i>Pooled ORs (95% CI)</i> | <i>P</i> | <i>I<sup>2</sup></i> | <i>P</i> |
|------------------------------------------|------------------------------|----------------------------|----------|----------------------|----------|
| <b>Statistical method</b>                |                              |                            |          |                      |          |
| Fixed effect                             | 21                           | 1.95 (1.92, 1.98)          | <0.001   | 89%                  | <0.001   |
| Random effect                            | 21                           | 2.11 (1.97, 2.27)          | <0.001   | 89%                  | <0.001   |
| <b>Study design</b>                      |                              |                            |          |                      |          |
| Prospective                              | 6                            | 2.09 (1.83, 2.40)          | <0.001   | 94%                  | <0.001   |
| Retrospective                            | 15                           | 1.93 (1.89, 1.97)          | <0.001   | 86%                  | <0.001   |
| <b>Study method</b>                      |                              |                            |          |                      |          |
| Case-control                             | 2                            | 2.15 (1.64, 2.82)          | <0.001   | 0%                   | 0.730    |
| Cohort                                   | 19                           | 2.11 (1.96, 2.27)          | <0.001   | 90%                  | <0.001   |
| <b>Sample size</b>                       |                              |                            |          |                      |          |
| ≥5,000                                   | 11                           | 1.94 (1.91, 1.97)          | <0.001   | 94%                  | <0.001   |
| <5,000, ≥2,000                           | 8                            | 2.11 (1.70, 2.63)          | <0.001   | 69%                  | 0.002    |
| <2,000                                   | 2                            | 2.38 (1.75, 3.23)          | <0.001   | 0%                   | 0.680    |
| <b>Quality grade of study</b>            |                              |                            |          |                      |          |
| High                                     | 2                            | 1.89 (1.50, 2.39)          | <0.001   | 98%                  | <0.001   |
| Medium                                   | 6                            | 2.15 (1.92, 2.40)          | <0.001   | 39%                  | 0.150    |
| Low                                      | 13                           | 2.19 (1.99, 2.42)          | <0.001   | 89%                  | <0.001   |
| <b>Source of pre-pregnancy BMI</b>       |                              |                            |          |                      |          |
| Recorded from medical records            | 12                           | 2.09 (1.93, 2.26)          | <0.001   | 92%                  | <0.001   |
| Self-reported                            | 5                            | 1.70 (1.41, 2.05)          | <0.001   | 18%                  | 0.300    |
| Questionnaire                            | 2                            | 3.14 (2.71, 3.64)          | <0.001   | 0%                   | 0.800    |
| Measured by research assistants          | 2                            | 2.00 (1.53, 2.62)          | <0.001   | 42%                  | 0.190    |
| <b>Pre-pregnancy categories of BMI</b>   |                              |                            |          |                      |          |
| Abrams and Parker                        | 3                            | 2.48 (1.91, 3.23)          | <0.001   | 94%                  | <0.001   |
| WHO                                      | 13                           | 2.23 (1.91, 2.59)          | <0.001   | 78%                  | <0.001   |
| IOM                                      | 4                            | 1.79 (1.64, 1.95)          | <0.001   | 92%                  | <0.001   |
| WGOC                                     | 1                            | 1.90 (1.35, 2.68)          | <0.001   | -                    | -        |
| <b>Distribution of pre-pregnancy BMI</b> |                              |                            |          |                      |          |
| Four groups                              | 13                           | 2.19 (1.91, 2.52)          | <0.001   | 93%                  | <0.001   |
| Three groups                             | 7                            | 2.08 (1.88, 2.31)          | <0.001   | 86%                  | <0.001   |
| Two groups                               | 1                            | 2.02 (1.78, 2.30)          | <0.001   | -                    | -        |
| <b>Source of BW</b>                      |                              |                            |          |                      |          |
| Recorded from medical records            | 8                            | 1.86 (1.63, 2.14)          | <0.001   | 66%                  | 0.005    |
| Not reported                             | 7                            | 2.28 (1.95, 2.66)          | <0.001   | 88%                  | <0.001   |
| Questionnaire                            | 1                            | 3.19 (2.63, 3.86)          | <0.001   | -                    | -        |
| Measured by research assistants          | 2                            | 2.93 (2.37, 3.63)          | <0.001   | 0%                   | 0.340    |
| Reported by mothers                      | 1                            | 1.87 (1.41, 2.47)          | <0.001   | -                    | -        |
| Date from birth certificate              | 2                            | 1.88 (1.75, 2.02)          | <0.001   | 90%                  | <0.001   |
| <b>Geographic location of study</b>      |                              |                            |          |                      |          |
| Asia                                     | 4                            | 1.79 (1.06, 3.01)          | <0.001   | 87%                  | <0.001   |
| North America                            | 8                            | 1.92 (1.78, 2.07)          | <0.001   | 86%                  | <0.001   |
| European                                 | 8                            | 2.34 (2.02, 2.72)          | <0.001   | 88%                  | <0.001   |
| Oceania                                  | 1                            | 2.26 (1.52, 3.36)          | <0.001   | -                    | -        |

BMI, body mass index; BW, birth weight; WHO, World Health Organization; IOM, Institute of Medicine; WGOC, Working Group on Obesity in China; APS, Asia-Pacific standard; LGA, large for gestational age.

doi:10.1371/journal.pone.0061627.t001

quality. Therefore, an adequately powered, high-quality cohort study is needed to investigate the impact of pre-pregnancy BMI on infant BW and offspring overweight/obesity.

Finally, other factors may also have contributed to the impact of pre-pregnancy BMI on BW and offspring overweight/obesity. These factors may have been maternal age, ethnicity, gestational



hypertension, gestational DM, smoking during pregnancy, educational level, and gestational weight gain (GWG) [83–85]. Therefore, further studies should adjust for these factors and analyze them at different levels.

The “fetal origins” hypothesis proposes that alterations in fetal nutrition results in developmental adaptations that permanently change the structure, physiology, and metabolism, thereby predisposing individuals to overweight/obesity in adulthood [86]. The process whereby a stimulus or insult at a sensitive or critical period of development has long-term effects is termed “programming” [87]. Malnutrition or over-nutrition in the mother have direct effects on the body size of the offspring, and may contribute to the risk of overweight/obesity in later life. Some studies have found that malnutrition or over-nutrition in the mother can cause epigenetic changes in humans that persist throughout life, which might explain the conclusions of our review.

The results of this review could aid better understanding of the impact of pre-pregnancy BMI on BW and offspring overweight/obesity. They could also be useful for the regulation of pre-pregnancy BMI so as to reduce the risk of overweight/obesity in offspring. A systemic review encompassing 75 articles on anti-obesity surgery showed that the risk of macrosomia could be lowered after maternal weight loss induced by surgery [88]. The pre-conception of weight loss also could reduce the risk of offspring obesity at age 7 years (OR, 0.41; 95% CI, 0.20–0.83;  $P < 0.01$ ) [89]. For underweight mothers, adequate weight gain during pregnancy could reduce the risk of LBW and SGA [90]. Hence, it might be possible to prevent the outcomes of offspring overweight/obesity by weight-regulation interventions in pre-pregnancy and pregnancy.

According to the studies included in this review, there remain some unresolved issues. Underweight mothers have a higher risk of SGA and LBW than normal-weight mothers, and some studies have shown that infants with SGA carry an increased risk of overweight/obesity. Results from the famine in the Netherlands showed that maternal malnutrition during early gestation was associated with a higher risk of offspring overweight/obesity. Some animal studies support the association between pre-pregnancy underweight and subsequent overweight/obesity in offspring. Nevertheless, further high-quality, large-sample, mother–infant cohort studies are needed.

Pre-pregnancy overweight or obesity increased the risk of LGA, HBW, macrosomia, and later offspring overweight/obesity has been confirmed in the review. Some weight-regulating intervention studies have displayed the short-term maternal and neonatal outcomes, which indicating that interventions can help pregnant and postpartum women manage their weight, decreased the risk of LGA, HBW, macrosomia. Few trials have addressed the growth and development outcomes (offspring overweight/obesity) resulting from maternal weight loss. However, there are several ongoing randomized trials examining the impact of interventions on not only optimal maternal–fetal outcomes, but also offspring obesity [91,92].

In addition, BW and offspring overweight/obesity are affected by maternal age, ethnicity, gestational hypertension and gestational DM, smoking during pregnancy, educational level, and GWG. Therefore, further studies assessing the impact of pre-pregnancy BMI on infant BW and offspring overweight/obesity should adjust for these factors and analyze them at different levels. Further, the impact of some important factors (GWG, smoking during pregnancy) on BW and offspring overweight/obesity need be assessed separately or interdependently with pre-pregnancy BMI. This understanding would help inform the evidence base for effective nutritional interventions in women before and during pregnancy.

In conclusion, our review suggests that, in comparison with mothers with a normal BMI: pre-pregnancy underweight increases the risk of SGA and LBW; pre-pregnancy overweight/obesity increases the risk of LGA, HBW, macrosomia, and subsequent offspring overweight/obesity. Recognition of this association may have important implications for primary prevention strategies for offspring overweight/obesity by targeting maternal pre-pregnancy BMI. However, this review also demonstrates other factors that may potentially mediate this association. These include maternal age, ethnicity, gestational hypertension and gestational DM, smoking during pregnancy, educational level, and GWG. These factors must be addressed in future studies. We also offer a developmental nutrition hypothesis on potential mechanisms involving epigenetic changes induced in the embryo. We can not confirm the association between pre-pregnancy underweight and offspring overweight/obesity according to the present study: further high-quality, large-sample, mother–infant cohort studies are needed.

## Supporting Information

### Appendix S1 Search strategy for CINAHL, EMBASE and MEDLINE databases.

(DOC)

### Appendix S2 Quality-assessment extraction form.

(DOC)

### Appendix S3 Quality assessment (grade) of the 45 studies included in the analysis.

(DOC)

### Appendix S4 Funnel plot and Egger’s test for a meta-analysis investigating the association between pre-pregnancy obesity and being LGA.

(DOC)

### Checklist S1 PRISMA Checklist for the meta-analysis.

(DOC)

### Figure S1 Forest plot of the association between pre-pregnancy BMI and LBW.

(TIF)

### Figure S2 Forest plot of the association between pre-pregnancy BMI and HBW.

(TIF)

### Figure S3 Forest plot of the association between pre-pregnancy BMI and macrosomia.

(TIF)

### Figure S4 Forest plot of the association between pre-pregnancy BMI and offspring overweight and obesity.

(TIF)

### Table S1 Characteristics of studies examining the relationship between pre-pregnancy BMI and BW.

(DOC)

### Table S2 Characteristics of studies examining the relationship between pre-pregnancy BMI and offspring overweight/obesity.

(DOC)

## Author Contributions

Conceived and designed the experiments: ZBY XRG. Performed the experiments: ZBY SPH JGZ. Analyzed the data: SPH XFS CBJ. Contributed reagents/materials/analysis tools: CBJ ZBY. Wrote the paper: ZBY XRG.

## References

- Li XY, Jiang Y, Hu N, Li YC, Zhang M, et al. (2012) [Prevalence and characteristic of overweight and obesity among adults in China, 2010]. *Zhonghua Yu Fang Yi Xue Za Zhi* 46: 683–686.
- Ge K (1995) *Dietary and Nutritional Status of Chinese people in 90th: report of China National Nutrition Survey of 1992*. Beijing: People's Medical Publishing House.
- Heslehurst N, Rankin J, Wilkinson JR, Summerbell CD (2010) A nationally representative study of maternal obesity in England, UK: trends in incidence and demographic inequalities in 619 323 births, 1989–2007. *Int J Obes (Lond)* 34: 420–428.
- Kim SY, Dietz PM, England L, Morrow B, Callaghan WM (2007) Trends in pre-pregnancy obesity in nine states, 1993–2003. *Obesity (Silver Spring)* 15: 986–993.
- Hinkle SN, Sharma AJ, Kim SY, Park S, Dalenius K, et al. (2012) Prepregnancy obesity trends among low-income women, United States, 1999–2008. *Matern Child Health J* 16: 1339–1348.
- Han Z, Mulla S, Beyene J, Liao G, McDonald SD (2011) Maternal underweight and the risk of preterm birth and low birth weight: a systematic review and meta-analyses. *Int J Epidemiol* 40: 65–101.
- Ferreira HS, Moura FA, Cabral CR, Jr, Florencio TM, Vieira RC, et al. (2009) Short stature of mothers from an area endemic for undernutrition is associated with obesity, hypertension and stunted children: a population-based study in the semi-arid region of Alagoas, Northeast Brazil. *Br J Nutr* 101: 1239–1245.
- Torloni MR, Betran AP, Horta BL, Nakamura MU, Atallah AN, et al. (2009) Prepregnancy BMI and the risk of gestational diabetes: a systematic review of the literature with meta-analysis. *Obes Rev* 10: 194–203.
- Hoff GL, Cai J, Okah FA, Dew PC (2009) Pre-pregnancy overweight status between successive pregnancies and pregnancy outcomes. *J Womens Health (Larchmt)* 18: 1413–1417.
- Doherty DA, Magann EF, Francis J, Morrison JC, Newnham JP (2006) Pre-pregnancy body mass index and pregnancy outcomes. *Int J Gynaecol Obstet* 95: 242–247.
- Heslehurst N, Simpson H, Ells IJ, Rankin J, Wilkinson J, et al. (2008) The impact of maternal BMI status on pregnancy outcomes with immediate short-term obstetric resource implications: a meta-analysis. *Obes Rev* 9: 635–683.
- Chu SY, Kim SY, Schmid CH, Dietz PM, Callaghan WM, et al. (2007) Maternal obesity and risk of cesarean delivery: a meta-analysis. *Obes Rev* 8: 385–394.
- Liu X, Du J, Wang G, Chen Z, Wang W, et al. (2011) Effect of pre-pregnancy body mass index on adverse pregnancy outcome in north of China. *Arch Gynecol Obstet* 283: 65–70.
- Samuels-Kalow ME, Funai EF, Buhimschi C, Norwitz E, Perrin M, et al. (2007) Prepregnancy body mass index, hypertensive disorders of pregnancy, and long-term maternal mortality. *Am J Obstet Gynecol* 197: 490 e491–496.
- Sebastian Manzanares G, Angel Santalla H, Irene Vico Z, Lopez Criado MS, Alicia Pineda L, et al. (2012) Abnormal maternal body mass index and obstetric and neonatal outcome. *J Matern Fetal Neonatal Med* 25: 308–312.
- Kalk P, Guthmann F, Krause K, Relle K, Godes M, et al. (2009) Impact of maternal body mass index on neonatal outcome. *Eur J Med Res* 14: 216–222.
- Stothard KJ, Tennant PW, Bell R, Rankin J (2009) Maternal overweight and obesity and the risk of congenital anomalies: a systematic review and meta-analysis. *JAMA* 301: 636–650.
- Cresswell JA, Campbell OM, De Silva MJ, Filippi V (2012) Effect of maternal obesity on neonatal death in sub-Saharan Africa: multivariable analysis of 27 national datasets. *Lancet* 380: 1325–1330.
- Van Lieshout RJ, Taylor VH, Boyle MH (2011) Pre-pregnancy and pregnancy obesity and neurodevelopmental outcomes in offspring: a systematic review. *Obes Rev* 12: e548–559.
- Patel SP, Rodriguez A, Little MP, Elliott P, Pekkanen J, et al. (2012) Associations between pre-pregnancy obesity and asthma symptoms in adolescents. *J Epidemiol Community Health* 66: 809–814.
- Monasta L, Batty GD, Cattaneo A, Lutje V, Ronfani L, et al. (2010) Early-life determinants of overweight and obesity: a review of systematic reviews. *Obes Rev* 11: 695–708.
- Ruager-Martin R, Hyde MJ, Modi N (2010) Maternal obesity and infant outcomes. *Early Hum Dev* 86: 715–722.
- Khandaker GM, Dibben CR, Jones PB (2012) Does maternal body mass index during pregnancy influence risk of schizophrenia in the adult offspring? *Obes Rev* 13: 518–527.
- Rinaudo PF, Lamb J (2008) Fetal origins of perinatal morbidity and/or adult disease. *Semin Reprod Med* 26: 436–445.
- Fallucca S, Vasta M, Sciuolo E, Balducci S, Fallucca F (2009) Birth weight: genetic and intrauterine environment in normal pregnancy. *Diabetes Care* 32: e149.
- Yu ZB, Han SP, Zhu GZ, Zhu C, Wang XJ, et al. (2011) Birth weight and subsequent risk of obesity: a systematic review and meta-analysis. *Obes Rev* 12: 525–542.
- Upadhyay, Bicha RP, Sherpa MT, Shrestha R, Panta PP (2011) Association between maternal body mass index and the birth weight of neonates. *Nepal Med Coll J* 13: 42–45.
- Drake AJ, Reynolds RM (2010) Impact of maternal obesity on offspring obesity and cardiometabolic disease risk. *Reproduction* 140: 387–398.
- Stroup DF, Berlin JA, Morton SC, Olkin I, Williamson GD, et al. (2000) Meta-analysis of observational studies in epidemiology: a proposal for reporting. Meta-analysis Of Observational Studies in Epidemiology (MOOSE) group. *JAMA* 283: 2008–2012.
- Mamun AA, Callaway LK, O'Callaghan MJ, Williams GM, Najman JM, et al. (2011) Associations of maternal pre-pregnancy obesity and excess pregnancy weight gains with adverse pregnancy outcomes and length of hospital stay. *BMC Pregnancy Childbirth* 11: 62.
- World Health Organization (2000) *Obesity: preventing and managing the global epidemic*. Report of the WHO consultation. WHO Technical Report Series. Geneva: World Health Organization.
- IOM Institute of Medicine (1990) *Nutrition during pregnancy*. Washington, DC: National Academy Press.
- Adams SV, Hastert TA, Huang Y, Starr JR (2011) No association between maternal pre-pregnancy obesity and risk of hypospadias or cryptorchidism in male newborns. *Birth Defects Res A Clin Mol Teratol* 91: 241–248.
- Melzer K, Schutz Y (2010) Pre-pregnancy and pregnancy predictors of obesity. *Int J Obes (Lond)* 34 Suppl 2: S44–52.
- Behrman RE, Kliegman RM, Jenson HB (Editors). (2003) *Nelson's Textbook of Pediatrics*, 17th edn. Saunders, Philadelphia.
- Tzamaloukas AH, Murata GH, Hoffman RM, Schmidt DW, Hill JE, et al. (2003) Classification of the degree of obesity by body mass index or by deviation from ideal weight. *JPEN J Parenter Enteral Nutr* 27: 340–348.
- Tooth L, Ware R, Bain C, Purdie DM, Dobson A (2005) Quality of reporting of observational longitudinal research. *Am J Epidemiol* 161: 280–288.
- Xi B, Liang Y, He T, Reilly KH, Hu Y, et al. (2012) Secular trends in the prevalence of general and abdominal obesity among Chinese adults, 1993–2009. *Obes Rev* 13: 287–296.
- Begg CB, Mazumdar M (1994) Operating characteristics of a rank correlation test for publication bias. *Biometrics* 50: 1088–1101.
- Sehire NJ, Jolly M, Harris JP, Wadsworth J, Joffe M, et al. (2001) Maternal obesity and pregnancy outcome: a study of 287,213 pregnancies in London. *Int J Obes Relat Metab Disord* 25: 1175–1182.
- Baeten JM, Bukusi EA, Lambe M (2001) Pregnancy complications and outcomes among overweight and obese nulliparous women. *Am J Public Health* 91: 436–440.
- Jensen DM, Damm P, Sorensen B, Molsted-Pedersen L, Westergaard JG, et al. (2003) Pregnancy outcome and prepregnancy body mass index in 2459 glucose-tolerant Danish women. *Am J Obstet Gynecol* 189: 239–244.
- Rode L, Nilas L, Wojdemann K, Tabor A (2005) Obesity-related complications in Danish single cephalic term pregnancies. *Obstet Gynecol* 105: 537–542.
- Hedderston MM, Weiss NS, Sacks DA, Pettitt DJ, Selby JV, et al. (2006) Pregnancy weight gain and risk of neonatal complications: macrosomia, hypoglycemia, and hyperbilirubinemia. *Obstet Gynecol* 108: 1153–1161.
- Bhattacharya S, Campbell DM, Liston WA (2007) Effect of Body Mass Index on pregnancy outcomes in nulliparous women delivering singleton babies. *BMC Public Health* 7: 168.
- Frederick IO, Williams MA, Sales AE, Martin DP, Killien M (2008) Pre-pregnancy body mass index, gestational weight gain, and other maternal characteristics in relation to infant birth weight. *Matern Child Health J* 12: 557–567.
- Leung TY, Leung TN, Sahota DS, Chan OK, Chan LW, et al. (2008) Trends in maternal obesity and associated risks of adverse pregnancy outcomes in a population of Chinese women. *BJOG* 115: 1529–1537.
- Gilboa SM, Correa A, Alverson CJ (2008) Use of spline regression in an analysis of maternal prepregnancy body mass index and adverse birth outcomes: does it tell us more than we already know? *Ann Epidemiol* 18: 196–205.
- Joy S, Istwan N, Rhea D, Desch C, Stanziano G (2009) The impact of maternal obesity on the incidence of adverse pregnancy outcomes in high-risk term pregnancies. *Am J Perinatol* 26: 345–349.
- Dietz PM, Callaghan WM, Sharma AJ (2009) High pregnancy weight gain and risk of excessive fetal growth. *Am J Obstet Gynecol* 201: 51 e51–56.
- Oken E, Kleinman KP, Belfort MB, Hammit JK, Gillman MW (2009) Associations of gestational weight gain with short- and longer-term maternal and child health outcomes. *Am J Epidemiol* 170: 173–180.
- Meher Un N, Aslam M, Ahmed SR, Rajab M, Kattea L (2009) Impact of obesity on fetomaternal outcome in pregnant Saudi females. *Int J Health Sci (Qassim)* 3: 187–195.
- Khashan AS, Kenny LC (2009) The effects of maternal body mass index on pregnancy outcome. *Eur J Epidemiol* 24: 697–705.
- Margerison Zilko CE, Rehkopf D, Abrams B (2010) Association of maternal gestational weight gain with short- and long-term maternal and child health outcomes. *Am J Obstet Gynecol* 202: 574 e571–578.
- Aydin C, Baloglu A, Yavuzcan A, Inci A (2010) The effect of body mass index value during labor on pregnancy outcomes in Turkish population (obesity and pregnancy outcomes). *Arch Gynecol Obstet* 281: 49–54.
- Narchi H, Skinner A (2010) Overweight and obesity in pregnancy do not adversely affect neonatal outcomes: new evidence. *J Obstet Gynaecol* 30: 679–686.

57. Athukorala C, Rumbold AR, Willson KJ, Crowther CA (2010) The risk of adverse pregnancy outcomes in women who are overweight or obese. *BMC Pregnancy Childbirth* 10: 56.
58. Mantakas A, Farrell T (2010) The influence of increasing BMI in nulliparous women on pregnancy outcome. *Eur J Obstet Gynecol Reprod Biol* 153: 43–46.
59. Chen Z, Du J, Shao L, Zheng L, Wu M, et al. (2010) Prepregnancy body mass index, gestational weight gain, and pregnancy outcomes in China. *Int J Gynaecol Obstet* 109: 41–44.
60. Tabatabaei M (2011) Gestational weight gain, prepregnancy body mass index related to pregnancy outcomes in KAZERUN, FARS, IRAN. *J Prenat Med* 5: 35–40.
61. Park S, Sappenfield WM, Bish C, Salihu H, Goodman D, et al. (2011) Assessment of the Institute of Medicine recommendations for weight gain during pregnancy: Florida, 2004–2007. *Matern Child Health J* 15: 289–301.
62. Rayis DA, Abbaker AO, Salih Y, Adam I (2011) Obesity and pregnancy outcome in Khartoum, Sudan. *Int J Gynaecol Obstet* 113: 160–161.
63. Han YS, Ha EH, Park HS, Kim YJ, Lee SS (2011) Relationships between pregnancy outcomes, biochemical markers and pre-pregnancy body mass index. *Int J Obes (Lond)* 35: 570–577.
64. Joshi S, Unni J, Vijay S, Khanijo V, Gupte N, et al. (2011) Obesity and pregnancy outcome in a private tertiary hospital in India. *Int J Gynaecol Obstet* 114: 82–83.
65. Saereporncharenkul K (2011) Correlation of BMI to pregnancy outcomes in Thai women delivered in Rajavithi Hospital. *J Med Assoc Thai* 94 Suppl 2: S52–58.
66. Hunt KJ, Alanis MC, Johnson ER, Mayorga ME, Korte JE (2012) Maternal Pre-Pregnancy Weight and Gestational Weight Gain and Their Association with Birthweight with a Focus on Racial Differences. *Matern Child Health J* [Epub ahead of print].
67. Di Benedetto A, D'Anna R, Cannata ML, Giordano D, Interdonato ML, et al. (2012) Effects of prepregnancy body mass index and weight gain during pregnancy on perinatal outcome in glucose-tolerant women. *Diabetes Metab* 38: 63–67.
68. Munim S, Maheen H (2012) Association of gestational weight gain and prepregnancy body mass index with adverse pregnancy outcome. *J Coll Physicians Surg Pak* 22: 694–698.
69. Heude B, Thiebaugeorges O, Goua V, Forhan A, Kaminski M, et al. (2012) Pre-pregnancy body mass index and weight gain during pregnancy: relations with gestational diabetes and hypertension, and birth outcomes. *Matern Child Health J* 16: 355–363.
70. Ferraro ZM, Barrowman N, Prud'homme D, Walker M, Wen SW, et al. (2012) Excessive gestational weight gain predicts large for gestational age neonates independent of maternal body mass index. *J Matern Fetal Neonatal Med* 25: 538–542.
71. Jeric M, Roje D, Medic N, Strinic T, Mestrovic Z, et al. (2012) Maternal prepregnancy underweight and fetal growth in relation to institute of medicine recommendations for gestational weight gain. *Early Hum Dev*. pii: S0378–3782(12)00247-2. doi: 10.1016/j.earlhumdev.2012.10.004. [Epub ahead of print].
72. Whitaker RC (2004) Predicting preschooler obesity at birth: the role of maternal obesity in early pregnancy. *Pediatrics* 114: e29–36.
73. Padez C, Mourao I, Moreira P, Rosado V (2005) Prevalence and risk factors for overweight and obesity in Portuguese children. *Acta Paediatr* 94: 1550–1557.
74. Li C, Kaur H, Choi WS, Huang TT, Lee RE, et al. (2005) Additive interactions of maternal prepregnancy BMI and breast-feeding on childhood overweight. *Obes Res* 13: 362–371.
75. Salsberry PJ, Reagan PB (2005) Dynamics of early childhood overweight. *Pediatrics* 116: 1329–1338.
76. Dubois L, Girard M (2006) Early determinants of overweight at 4.5 years in a population-based longitudinal study. *Int J Obes (Lond)* 30: 610–617.
77. Hernandez-Valero MA, Wilkinson AV, Forman MR, Etzel CJ, Cao Y, et al. (2007) Maternal BMI and country of birth as indicators of childhood obesity in children of Mexican origin. *Obesity (Silver Spring)* 15: 2512–2519.
78. Hawkins SS, Cole TJ, Law C (2009) An ecological systems approach to examining risk factors for early childhood overweight: findings from the UK Millennium Cohort Study. *J Epidemiol Community Health* 63: 147–155.
79. Gewa CA (2010) Childhood overweight and obesity among Kenyan pre-school children: association with maternal and early child nutritional factors. *Public Health Nutr* 13: 496–503.
80. Maddah M, Nikooyeh B (2010) Factors associated with overweight in children in Rasht, Iran: gender, maternal education, skipping breakfast and parental obesity. *Public Health Nutr* 13: 196–200.
81. Laitinen J, Jaaskelainen A, Hartikainen AL, Sovio U, Vaarasmaki M, et al. (2012) Maternal weight gain during the first half of pregnancy and offspring obesity at 16 years: a prospective cohort study. *BJOG* 119: 716–723.
82. Janjua NZ, Mahmood B, Islam MA, Goldenberg RL (2012) Maternal and Early Childhood Risk Factors for Overweight and Obesity among Low-Income Predominantly Black Children at Age Five Years: A Prospective Cohort Study. *J Obes* 2012: 457173.
83. Stannes Kopp UM, Dahl-Jorgensen K, Stigum H, Frost Andersen L, Naess O, et al. (2012) The associations between maternal pre-pregnancy body mass index or gestational weight change during pregnancy and body mass index of the child at 3 years of age. *Int J Obes (Lond)* 36: 1325–1331.
84. Payas N, Budd GM, Polansky M (2010) Exploring relationships among maternal BMI, family factors, and concern for child's weight. *J Child Adolesc Psychiatr Nurs* 23: 223–230.
85. Savitz DA, Stein CR, Siega-Riz AM, Herring AH (2011) Gestational weight gain and birth outcome in relation to prepregnancy body mass index and ethnicity. *Ann Epidemiol* 21: 78–85.
86. Muhlhauser BS, Ong ZY (2011) The Fetal Origins of Obesity: Early Origins of Altered Food Intake. *Endocr Metab Immune Disord Drug Targets* 11:189–197.
87. Barker DJ (1995) Intrauterine programming of adult disease. *Mol Med Today* 1: 418–423.
88. Maggard MA, Yermilov I, Li Z, Maglione M, Newberry S, et al. (2008) Pregnancy and fertility following bariatric surgery: a systematic review. *JAMA* 300: 2286–2296.
89. Kral JG, Biron S, Simard S, Hould FS, Lebel S, et al. (2006) Large maternal weight loss from obesity surgery prevents transmission of obesity to children who were followed for 2 to 18 years. *Pediatrics* 118: e1644–1649.
90. Mitchell MC, Lerner E (1989) Weight gain and pregnancy outcome in underweight and normal weight women. *J Am Diet Assoc* 89: 634–638, 641.
91. Moholdt TT, Salvesen K, Ingul CB, Vik T, Oken E, et al. (2011) Exercise Training in Pregnancy for obese women (ETIP): study protocol for a randomised controlled trial. *Trials* 12: 154.
92. Adamo KB, Ferraro ZM, Brett KE (2012) Can we modify the intrauterine environment to halt the intergenerational cycle of obesity? *Int J Environ Res Public Health* 9: 1263–1307.
